# Supplementary material for: Ru supported on activated carbon and coated with a polydopamine layer for effective acetylene hydrochlorination
Source: Royal Society of Chemistry journal article supplement (doi:10.1039/d2cy00786j), 2022-01-01
Supplement: d2cy00786j1.pdf [file d2cy00786j1.pdf]

1

## Supplementary Material

### 2 **Ru supported on activated carbon and coated with polydopamine** 3 **layer for effective acetylene hydrochlorination**

4 Miaomiao Zhang <sup>a</sup>, Haiyang Zhang <sup>a,\*</sup>, Feng Li <sup>a</sup>, Lisha Yao <sup>a</sup>, Wencai Peng <sup>a,\*</sup>, Jinli  
5 Zhang <sup>a, b</sup>

6 <sup>a</sup> School of Chemistry and Chemical Engineering/Key Laboratory for Green  
7 Processing of Chemical Engineering of Xinjiang Bingtuan, Shihezi University,  
8 Shihezi 832000 (P.R. China); E-mail: zhy198722@163.com (H.Y. Zhang),  
9 pengwencai@shzu.edu.cn. (W.C. Peng).

10 <sup>b</sup> School of Chemical Engineering and Technology, Tianjin University, Tianjin  
11 300072 (P.R. China); E-mail: zhangjinli@tju.edu.cn (J.L. Zhang)

12 \*Corresponding authors: Tel: +86-993-2057-277;

13 E-mail: zhy198722@163.com (Haiyang Zhang); pengwencai@shzu.edu.cn (Wencai  
14 Peng)

15

## 1 **Table and Figure captions**

- 2 **Table S1** The relative content and binding energy of Ru species in the unreacted and reacted Ru-  
3 based catalysts.
- 4 **Table S2** EXAFS fitting parameters at the edge for various samples.
- 5
- 6 **Fig. S1** The (a) C<sub>2</sub>H<sub>2</sub> conversion and (b) selectivity to VCM of different catalysts. Reaction  
7 condition: T=180 °C, GHSV(C<sub>2</sub>H<sub>2</sub>) = 180 h<sup>-1</sup>, and V(HCl)/V(C<sub>2</sub>H<sub>2</sub>) = 1.15.
- 8 **Fig. S2** (a) Raman spectra and (b) FT-IR spectra of PDA-*T* materials.
- 9 **Fig. S3** FT-IR spectra of unreacted catalysts.
- 10 **Fig. S4** HAADF-STEM images of the all catalysts.
- 11 **Fig. S5** SEM images of the unreacted PDA catalysts.
- 12 **Fig. S6** HADDF-TEM images of the (a) unreacted Ru/AC@PDA-100, (b) reacted Ru/AC@PDA-  
13 100, (c) unreacted Ru/AC@PDA-500, (d) reacted Ru/AC@PDA-500, (e) unreacted  
14 Ru/AC@PDA-800, and (f) reacted Ru/AC@PDA-800.
- 15 **Fig. S7** Nitrogen adsorption-desorption isotherms of the (a) unreacted and (b) reacted catalysts.
- 16 **Fig. S8** TG curves of the unreacted and reacted catalysts recorded under air atmosphere.
- 17 **Fig. S9** MS spectra (m/z = 16) of the unreacted Ru catalysts.
- 18 **Fig. S10** Ru 3*p* XPS spectra of the reacted Ru catalysts.
- 19 **Fig. S11** The real/imaginary component of the FT with the scattering paths used in the fitting  
20 models.
- 21 **Fig. S12** Wavelet transform spectra of the Ru-based catalysts.
- 22 **Fig. S13** (a) N 1*s* XPS spectrum of the unreacted AC@PDA catalyst and (b) possible structure of  
23 PDA.
- 24 **Fig. S14** The most stable calculation model of the complex.
- 25 **Fig. S15** Energy profiles of Ru/AC catalyst for acetylene hydrochlorination.

1

**Table S1** The relative content and binding energy of Ru species in the unreacted and reacted Ru-based catalysts.

| Catalyst                | Binding energy (eV) , ( Area% ) |                  |                  |                          |                 |                        |
|-------------------------|---------------------------------|------------------|------------------|--------------------------|-----------------|------------------------|
|                         | Ru <sup>n+</sup> (n>4)          | Ru <sup>4+</sup> | Ru <sup>3+</sup> | Ru <sup>z+</sup> (1<z<3) | Ru <sup>0</sup> | Ru <sup>m+</sup> (m≥3) |
| Unreacted Ru/AC         | 467.6 (14.2)                    | 465.0 (17.2)     | 463.1 (35.0)     | /                        | 461.3 (33.6)    | 66.4                   |
| Reacted Ru/AC           | 467.3 (8.9)                     | 464.9 (26.2)     | 463.1 (29.9)     | /                        | 461.5 (35.0)    | 65.0                   |
| Unreacted Ru/AC@PDA-100 | 467.3 (15.4)                    | 465.2 (23.0)     | 463.9 (30.3)     | 462.0 (31.3)             | /               | 68.7                   |
| Reacted Ru/AC@PDA-100   | 467.7 (11.1)                    | 465.2 (18.3)     | 463.2 (35.7)     | /                        | 461.2 (34.9)    | 65.1                   |
| Unreacted Ru/AC@PDA-500 | 467.5 (19.7)                    | 465.4 (22.8)     | 463.5 (29.6)     | 461.6 (27.9)             | /               | 72.1                   |
| Reacted Ru/AC@PDA-500   | 467.8 (18.1)                    | 465.1 (16.1)     | 463.1 (33.1)     | /                        | 461.4 (32.7)    | 67.3                   |
| Unreacted Ru/AC@PDA-800 | 467.6 (26.9)                    | 465.7 (22.0)     | 463.6 (25.2)     | 461.6 (25.9)             | /               | 74.1                   |
| Reacted Ru/AC@PDA-800   | 468.0 (12.2)                    | 465.4 (14.6)     | 463.4 (33.6)     | /                        | 461.4 (39.6)    | 60.4                   |

2

1

**Table S2** EXAFS fitting parameters at the edge for various samples.

| Sample            | shell  | CN      | R(Å)      | $\sigma^2$ | $\Delta E_0$ | R factor |
|-------------------|--------|---------|-----------|------------|--------------|----------|
| Ru foil           | Ru-Ru  | 12      | 2.67±0.01 | 0.0037     | 2.2±0.7      | 0.0085   |
| RuO <sub>2</sub>  | Ru-O   | 7.8±1.0 | 1.98±0.01 | 0.0029     | 2.5±1.9      | 0.0197   |
| RuCl <sub>3</sub> | Ru-Cl  | 5.3±0.5 | 2.35±0.02 | 0.0036     | 0.2±2.1      | 0.0227   |
|                   | Ru-O/N | 1.7±0.4 | 1.81±0.02 | 0.0021     |              |          |
| Ru/AC             | Ru-Cl  | 4.2±0.3 | 2.36±0.01 | 0.0016     | -2.0±1.8     | 0.0139   |
|                   | Ru-Ru  | 4.1±0.6 | 2.60±0.02 | 0.0071     |              |          |
| Ru/AC@PDA-100     | Ru-O/N | 5.4±0.1 | 2.07±0.01 | 0.0041     | 4.3±0.7      | 0.0030   |
|                   | Ru-Ru  | 1.5±0.1 | 2.71±0.01 | 0.0048     |              |          |
| Ru/AC@PDA-500     | Ru-O/N | 5.9±0.4 | 2.07±0.01 | 0.0064     | 2.8±1.8      | 0.0137   |
|                   | Ru-Ru  | 1.1±0.2 | 2.70±0.01 | 0.0037     |              |          |
| Ru/AC@PDA-800     | Ru-O/N | 6.5±0.3 | 2.04±0.01 | 0.0040     | 3.6±1.2      | 0.0037   |

2 <sup>a</sup>N: coordination numbers; <sup>b</sup>R: bond distance; <sup>c</sup> $\sigma^2$ : Debye-Waller factors; <sup>d</sup>  $\Delta E_0$ : the inner potential

3 correction. R factor: goodness of fit.  $S_0^2$  was set to 0.71, according to the experimental EXAFS fit

4 of Ru foil reference by fixing CN as the known crystallographic value;  $\delta$ : percentage.

1

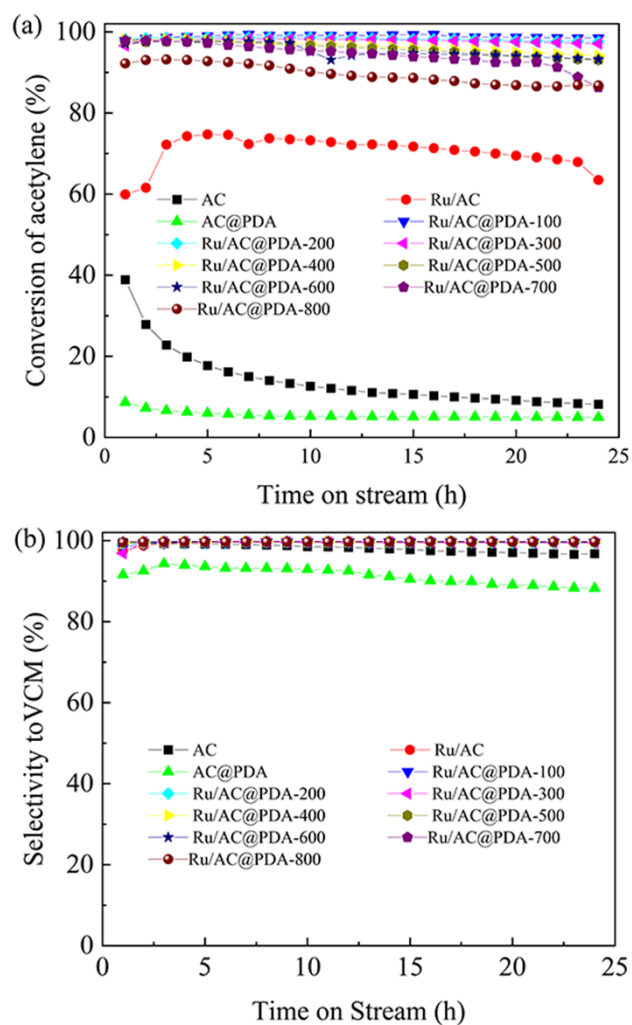

2

3 **Fig. S1** The (a)  $C_2H_2$  conversion and (b) selectivity to VCM of different catalysts.

4 Reaction condition:  $T=180\text{ }^\circ\text{C}$ ,  $GHSV(C_2H_2)=180\text{ h}^{-1}$ , and  $V(HCl)/V(C_2H_2)=1.15$ .

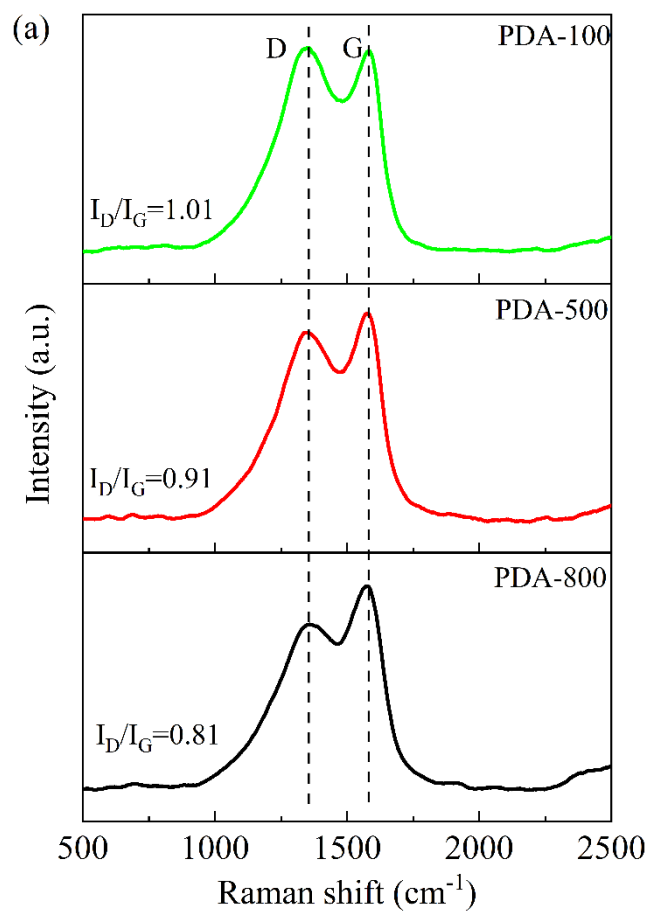

1

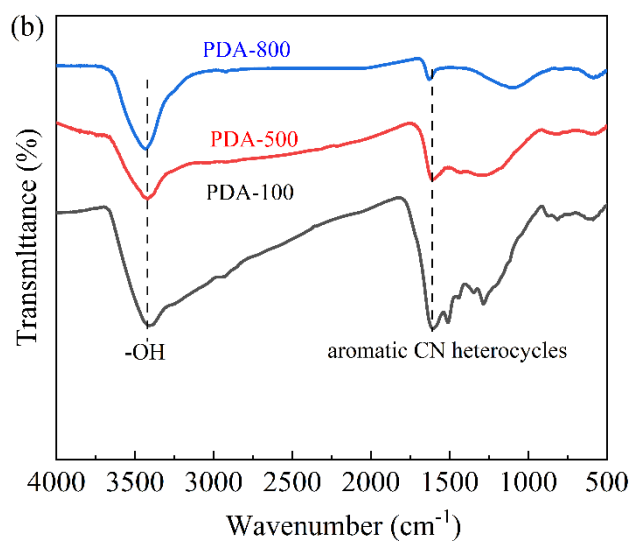

2

3

**Fig. S2** (a) Raman spectra and (b) FT-IR spectra of PDA-*T* materials.

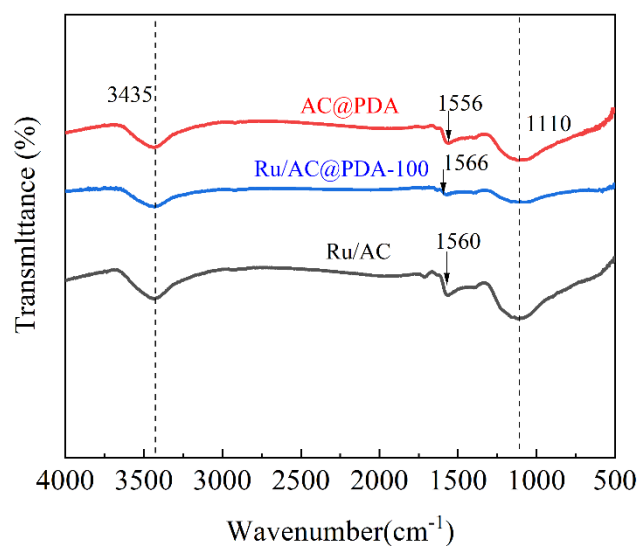

1

2

**Fig. S3** FT-IR spectra of unreacted catalysts.

3 The characteristic peaks are centered at 3435 cm<sup>-1</sup>: the -OH stretching vibration (e.g., those in  
4 phenol, carboxyl and chemisorbed water) <sup>1</sup>, 1110 cm<sup>-1</sup>: C-O stretching vibrations (e.g., ethers and  
5 phenols) <sup>2,3</sup>, and 1560 cm<sup>-1</sup>: aromatic CN heterocycles <sup>4,5</sup>.

6

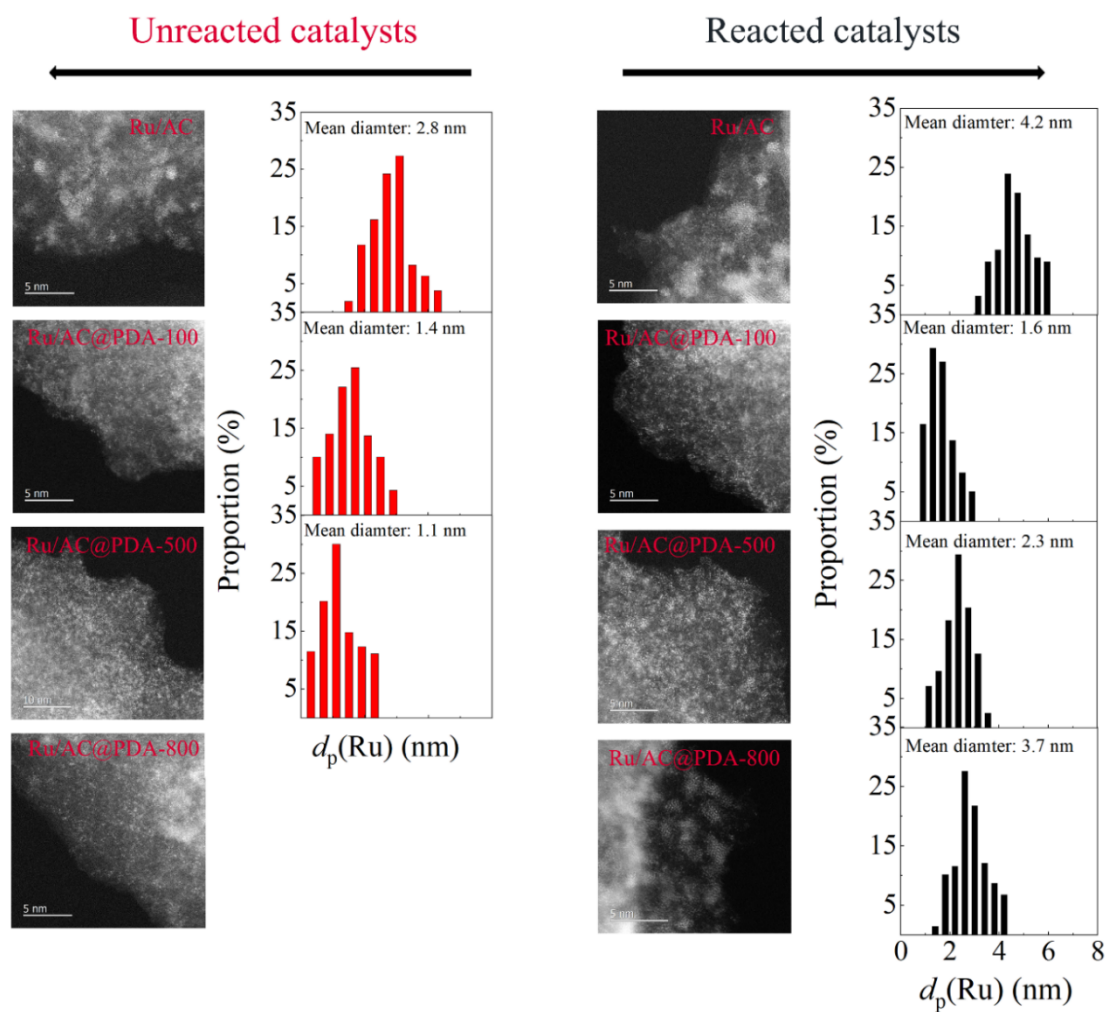

1

2

**Fig. S4** HAADF-STEM images of the all catalysts.

3 Synthesis of activated carbon (AC) supported ruthenium catalysts with varying ruthenium  
 4 particle size ( $d_p(\text{Ru})$ ) via thermal activation at different temperatures, indicated in the sample  
 5 code. HAADF-STEM images, with the respective metal particle size distribution, obtained from  
 6 analysis of >150 particles, visualize a steady metal particle growth with an increasing activation  
 7 temperature on carbon carriers.



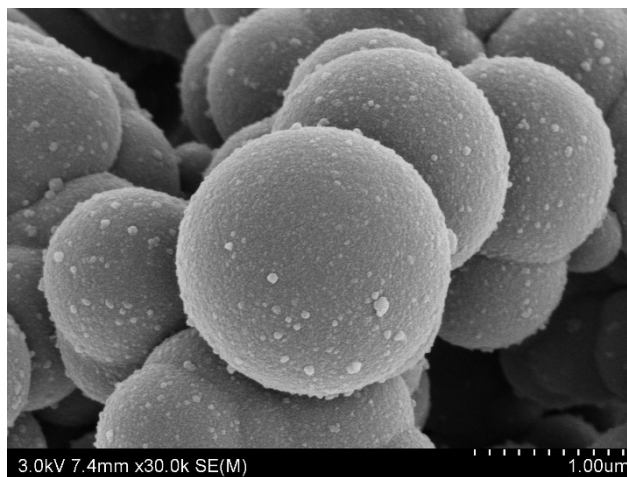

1

2

**Fig. S5** SEM images of the unreacted PDA catalysts.

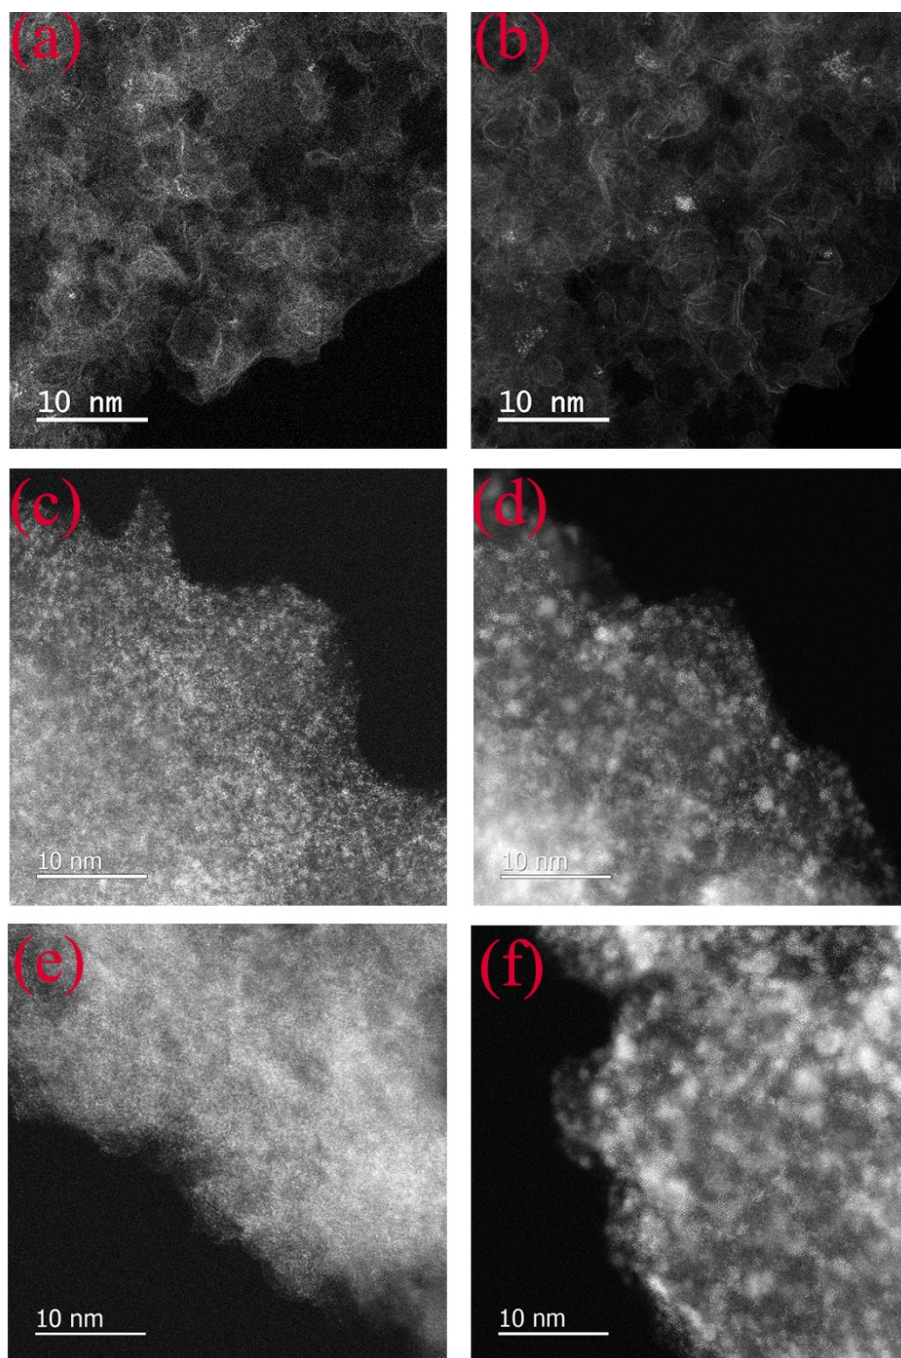

1

2

3

4

**Fig. S6** HADDF-TEM images of the (a) unreacted Ru/AC@PDA-100, (b) reacted Ru/AC@PDA-100, (c) unreacted Ru/AC@PDA-500, (d) reacted Ru/AC@PDA-500, (e) unreacted Ru/AC@PDA-800, and (f) reacted Ru/AC@PDA-800.

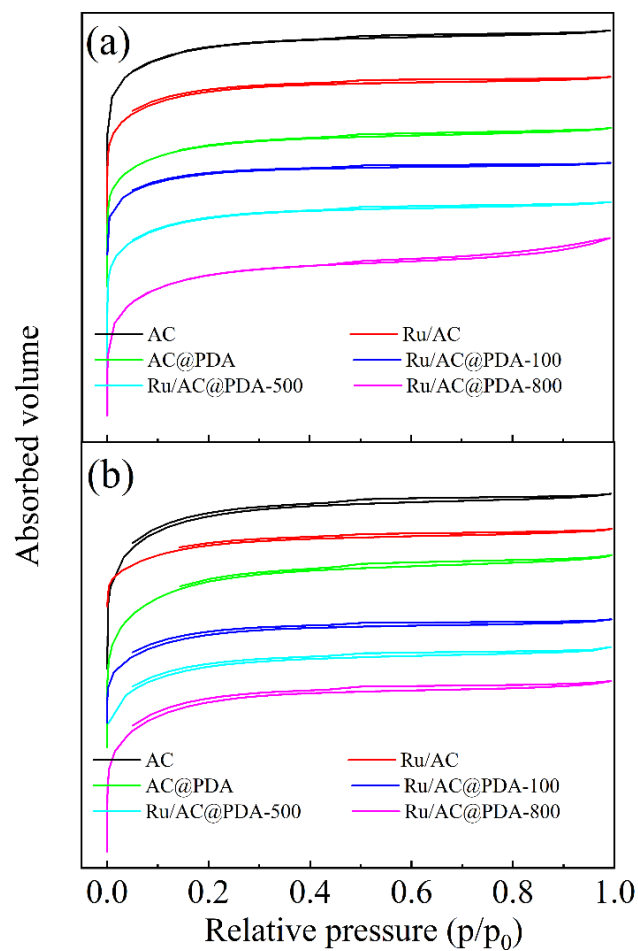

1

2 **Fig. S7** Nitrogen adsorption-desorption isotherms of the(a) unreacted and (b) reacted catalysts.

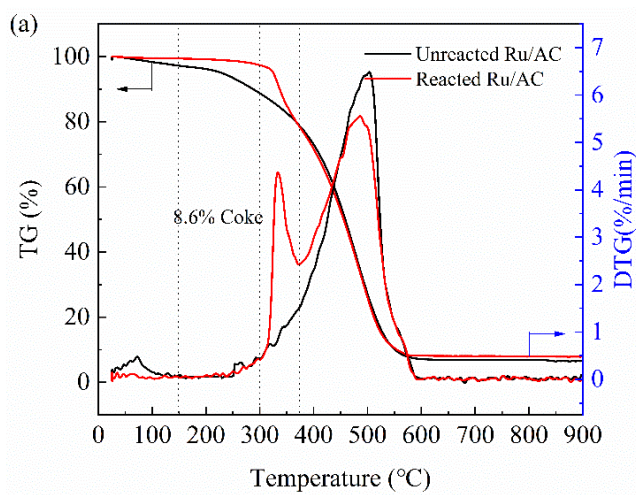

3

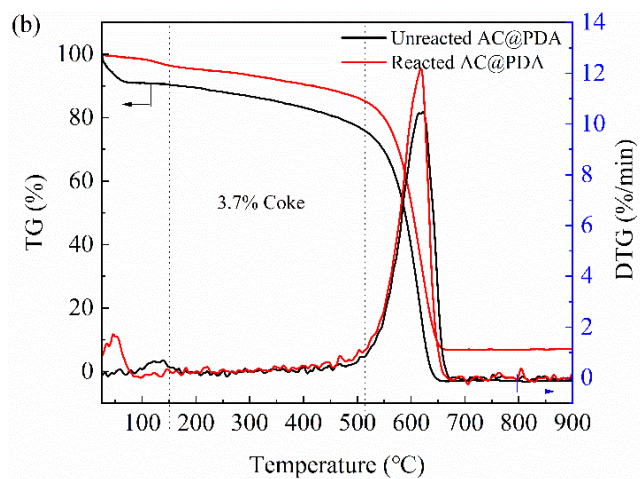

1

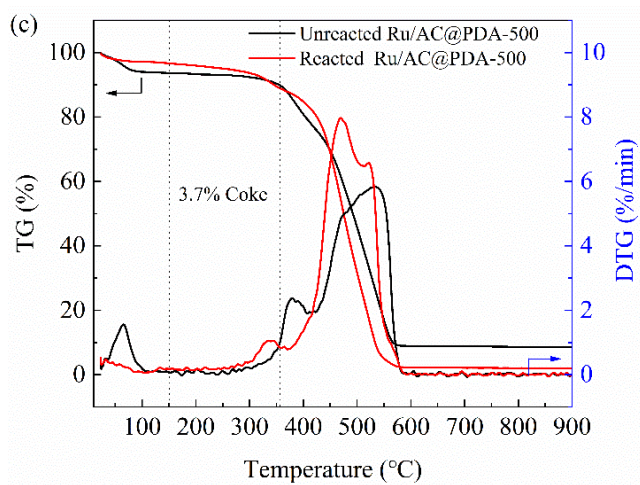

2

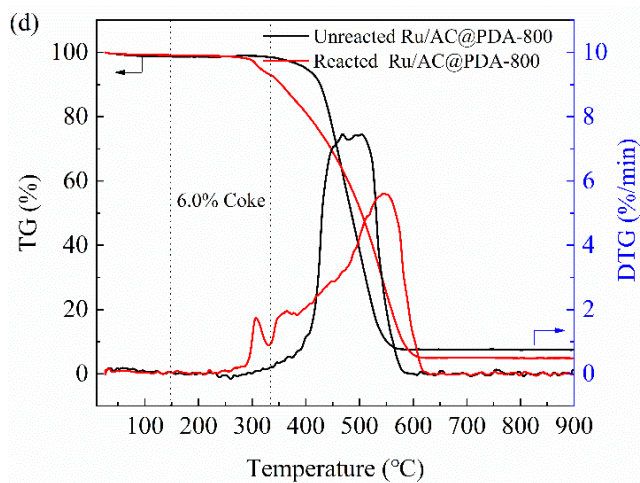

3

4 **Fig. S8** TG curves of the unreacted and reacted catalysts recorded under air atmosphere.

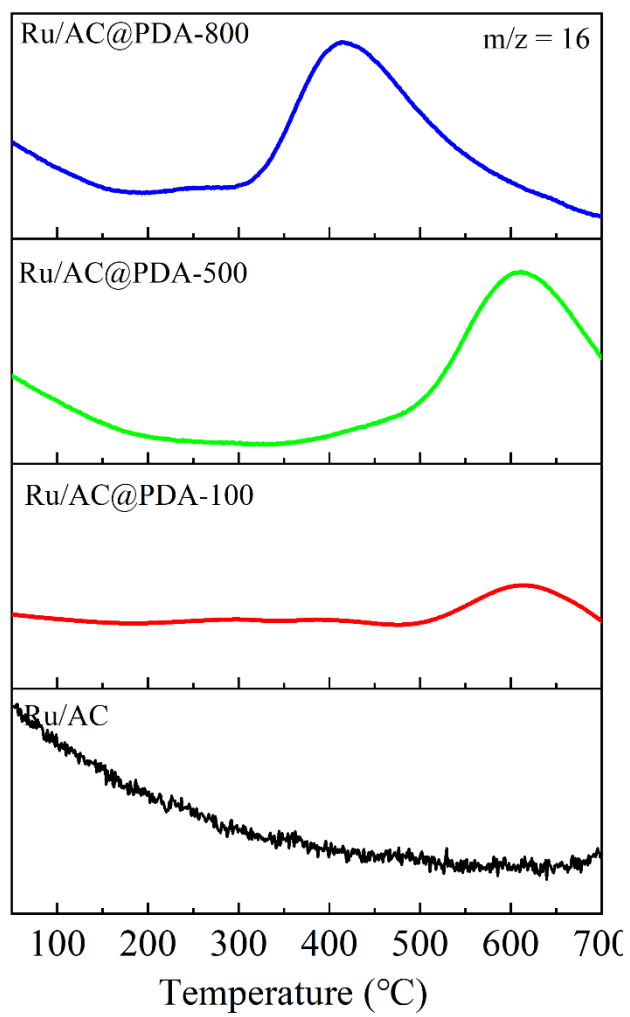

1

2

**Fig. S9** MS spectra ( $m/z = 16$ ) of the unreacted Ru catalysts.

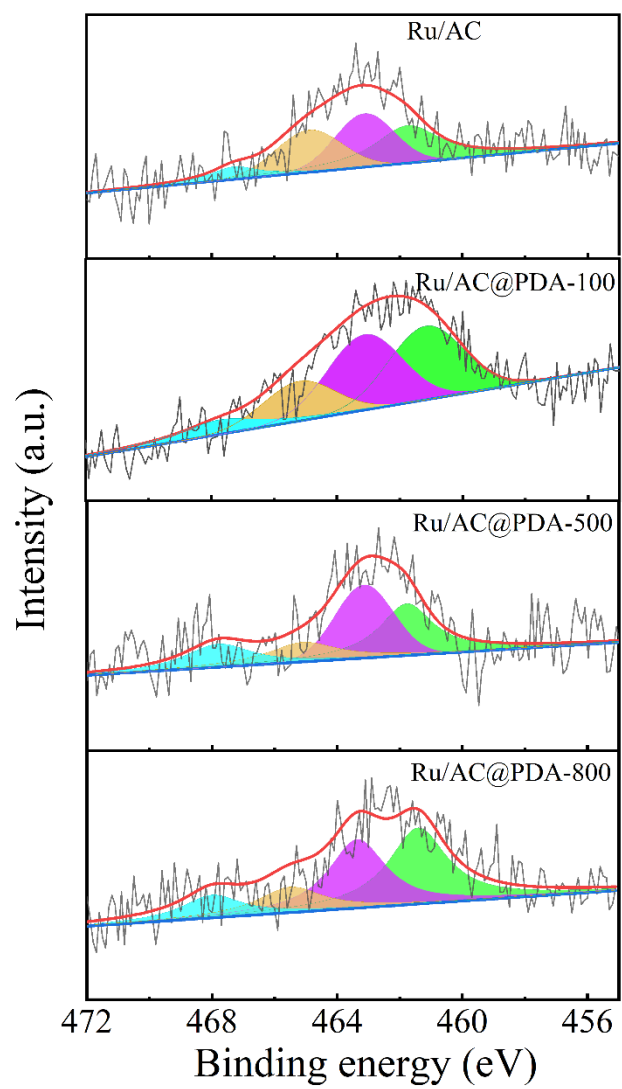

1

2

**Fig. S10** Ru 3p XPS spectra of the reacted Ru catalysts.

1

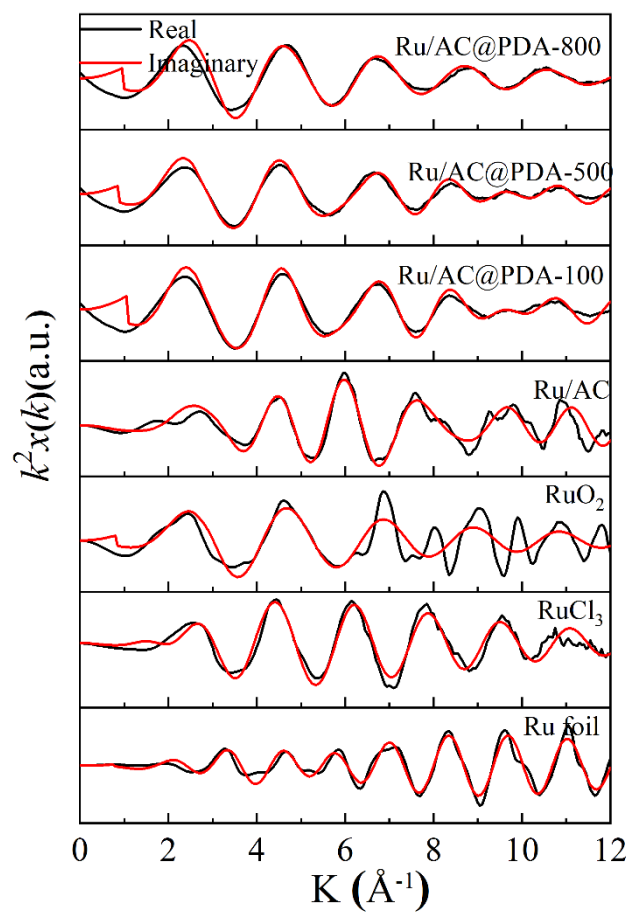

2

3 **Fig. S11** The real/imaginary component of the FT with the scattering paths used in the fitting

4

models.

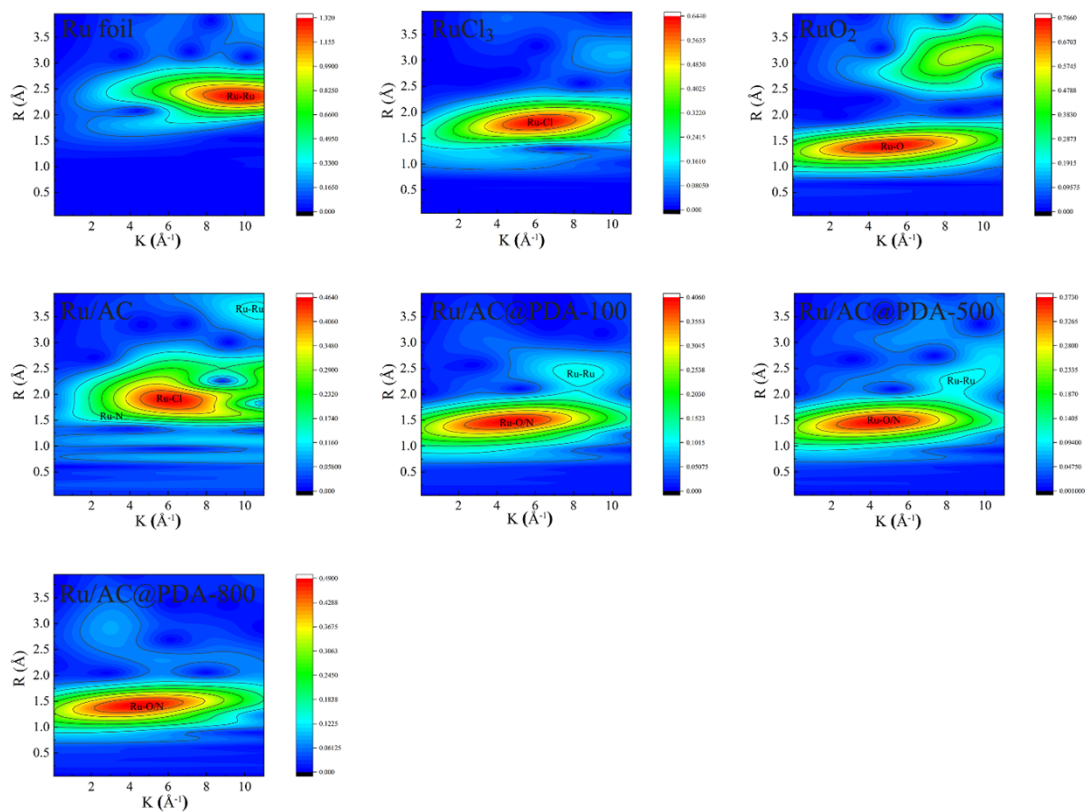

1

2

**Fig. S12** Wavelet transform spectra of the Ru-based catalysts.

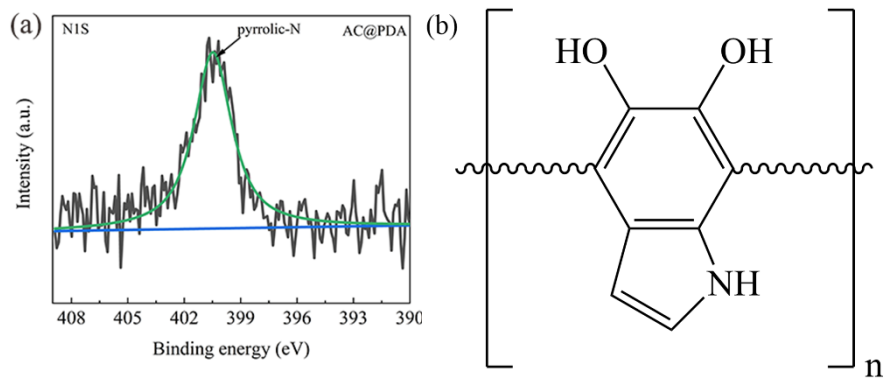

3

**Fig. S13** (a) N *1s* XPS spectrum of the unreacted AC@PDA catalyst and (b) possible structure of

5

PDA <sup>6,7</sup>.

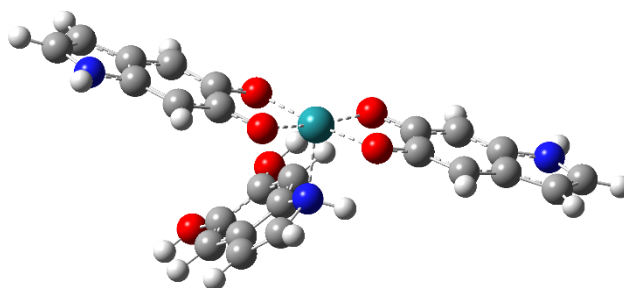

6

7

**Fig. S14** The most stable calculation model of the complex.



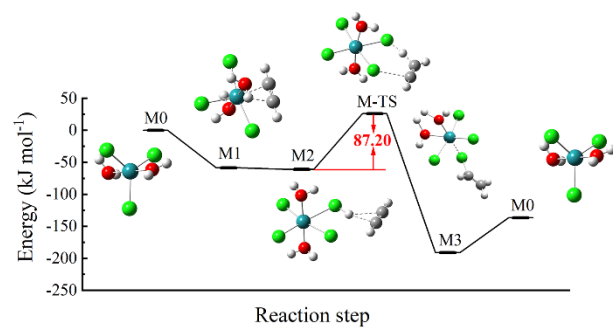

1

2

**Fig. S15** Energy profiles of Ru/AC catalyst for acetylene hydrochlorination.

## 1 References

- 2 1 A. M. Puziy, O. I. Poddubnaya, A. Martinez-Alonso, F. Suarez-Garcia and J. M. D.  
3 Tascon, *Carbon*, 2002, **40**, 1493-1505.
- 4 2 Y. Li, Q. Du, T. Liu, X. Peng, J. Wang, J. Sun, Y. Wang, S. Wu, Z. Wang, Y. Xia  
5 and L. Xia, *Chem. Eng. Res. Des.*, 2013, **91**, 361-368.
- 6 3 A.-N. A. El-Hendawy, *Carbon*, 2003, **41**, 713-722.
- 7 4 Z. Shen, Y. Liu, Y. Han, Y. Qin, J. Li, P. Xing and B. Jiang, *RSC Adv.*, 2020, **10**,  
8 14556-14569.
- 9 5 H. Zhang, Y. Wang, D. Wang, Y. Li, X. Liu, P. Liu, H. Yang, T. An, Z. Tang and  
10 H. Zhao, *Small*, 2014, **10**, 3371-3378.
- 11 6 X. Li, P. Li, X. Pan, H. Ma and X. Bao, *Appl. Catal. B-Environ.*, 2017, **210**, 116-  
12 120.
- 13 7 H. Lee, S. M. Dellatore, W. M. Miller and P. B. Messersmith, *Science*, 2007, **318**,  
14 426-430.
- 15
